# Supplementary material
Source: Elsevier journal article supplement (https://www.sciencedirect.com/science/article/pii/S0101328916000548)
Supplement: mmc1 [file S0101328916000548:mmc1.docx]

**Appendix 1 – Initial MADAAMI score sheet used for validation procedure of agreement. Caption: E – Excellent, G – Good, R – Regular, I – Insufficient; Retro – Pelvic retroversion; Ante – Pelvic anteversion; Neutral – Neutral position of the pelvis.**

| Position of the foot | Phases of *plié* | Steps | Criteria | Evaluation | Description of Pelvis Position |
| --- | --- | --- | --- | --- | --- |
| 1st Position (evaluate the right foot) | With Knees Extended | Static | Pelvic stability | E ( ) G ( ) R ( ) I ( ) | Retro ( ) Ante ( ) Neutral ( ) |
| Knee aligned with Foot | E ( ) G ( ) R ( ) I ( ) |  |
| Midfoot stability | E ( ) G ( ) R ( ) I ( ) |
| During *demi plié* | Descent | Pelvic stability | E ( ) G ( ) R ( ) I ( ) | Retro ( ) Ante ( ) Neutral ( ) |
| Knee aligned with Foot | E ( ) G ( ) R ( ) I ( ) |  |
| Midfoot stability | E ( ) G ( ) R ( ) I ( ) |
| End of the move | Pelvic stability | E ( ) G ( ) R ( ) I ( ) | Retro ( ) Ante ( ) Neutral ( ) |
| Knee aligned with Foot | E ( ) G ( ) R ( ) I ( ) |  |
| Midfoot stability | E ( ) G ( ) R ( ) I ( ) |
| Ascent | Pelvic stability | E ( ) G ( ) R ( ) I ( ) | Retro ( ) Ante ( ) Neutral ( ) |
| Knee aligned with Foot | E ( ) G ( ) R ( ) I ( ) |  |
| Midfoot stability | E ( ) G ( ) R ( ) I ( ) |
| With Knees Extended | Static | Pelvic stability | E ( ) G ( ) R ( ) I ( ) | Retro ( ) Ante ( ) Neutral ( ) |
| Knee aligned with Foot | E ( ) G ( ) R ( ) I ( ) |  |
| Midfoot stability | E ( ) G ( ) R ( ) I ( ) |
| During *grand plié* | Descent | Pelvic stability | E ( ) G ( ) R ( ) I ( ) | Retro ( ) Ante ( ) Neutral ( ) |
| Knee aligned with Foot | E ( ) G ( ) R ( ) I ( ) |  |
| Midfoot stability | E ( ) G ( ) R ( ) I ( ) |
| End of the move | Pelvic stability | E ( ) G ( ) R ( ) I ( ) | Retro ( ) Ante ( ) Neutral ( ) |
| Knee aligned with Foot | E ( ) G ( ) R ( ) I ( ) |  |
| Midfoot stability | E ( ) G ( ) R ( ) I ( ) |
| Ascent | Pelvic stability | E ( ) G ( ) R ( ) I ( ) | Retro ( ) Ante ( ) Neutral ( ) |
| Knee aligned with Foot | E ( ) G ( ) R ( ) I ( ) |  |
| Midfoot stability | E ( ) G ( ) R ( ) I ( ) |
| With Knees Extended | Static | Pelvic stability | E ( ) G ( ) R ( ) I ( ) | Retro ( ) Ante ( ) Neutral ( ) |
| Knee aligned with Foot | E ( ) G ( ) R ( ) I ( ) |  |
| Midfoot stability | E ( ) G ( ) R ( ) I ( ) |
| 2nd Position (evaluate the right foot) | With Knees Extended | Static | Pelvic stability | E ( ) G ( ) R ( ) I ( ) | Retro ( ) Ante ( ) Neutral ( ) |
| Knee aligned with Foot | E ( ) G ( ) R ( ) I ( ) |  |
| Midfoot stability | E ( ) G ( ) R ( ) I ( ) |
| During *demi plié* | Descent | Pelvic stability | E ( ) G ( ) R ( ) I ( ) | Retro ( ) Ante ( ) Neutral ( ) |
| Knee aligned with Foot | E ( ) G ( ) R ( ) I ( ) |  |
| Midfoot stability | E ( ) G ( ) R ( ) I ( ) |
| End of the move | Pelvic stability | E ( ) G ( ) R ( ) I ( ) | Retro ( ) Ante ( ) Neutral ( ) |
| Knee aligned with Foot | E ( ) G ( ) R ( ) I ( ) |  |
| Midfoot stability | E ( ) G ( ) R ( ) I ( ) |
| Ascent | Pelvic stability | E ( ) G ( ) R ( ) I ( ) | Retro ( ) Ante ( ) Neutral ( ) |
| Knee aligned with Foot | E ( ) G ( ) R ( ) I ( ) |  |
| Midfoot stability | E ( ) G ( ) R ( ) I ( ) |
| With Knees Extended | Static | Pelvic stability | E ( ) G ( ) R ( ) I ( ) | Retro ( ) Ante ( ) Neutral ( ) |
| Knee aligned with Foot | E ( ) G ( ) R ( ) I ( ) |  |
| Midfoot stability | E ( ) G ( ) R ( ) I ( ) |
| During *grand plié* | Descent | Pelvic stability | E ( ) G ( ) R ( ) I ( ) | Retro ( ) Ante ( ) Neutral ( ) |
| Knee aligned with Foot | E ( ) G ( ) R ( ) I ( ) |  |
| Midfoot stability | E ( ) G ( ) R ( ) I ( ) |
| End of the move | Pelvic stability | E ( ) G ( ) R ( ) I ( ) | Retro ( ) Ante ( ) Neutral ( ) |
| Knee aligned with Foot | E ( ) G ( ) R ( ) I ( ) |  |
| Midfoot stability | E ( ) G ( ) R ( ) I ( ) |
| Ascent | Pelvic stability | E ( ) G ( ) R ( ) I ( ) | Retro ( ) Ante ( ) Neutral ( ) |
| Knee aligned with Foot | E ( ) G ( ) R ( ) I ( ) |  |
| Midfoot stability | E ( ) G ( ) R ( ) I ( ) |
| With Knees Extended | Static | Pelvic stability | E ( ) G ( ) R ( ) I ( ) | Retro ( ) Ante ( ) Neutral ( ) |
| Knee aligned with Foot | E ( ) G ( ) R ( ) I ( ) |  |
| Midfoot stability | E ( ) G ( ) R ( ) I ( ) |
